# Supplementary material
Source: PubMed Central journal article supplement (PMC9847462)
Supplement: 41579_2022_841_MOESM1_ESM.pdf [file 41579_2022_841_MOESM1_ESM.pdf]

---

# SARS-CoV-2 variant biology: immune escape, transmission and fitness

---

In the format provided by the authors and unedited

---

# The COVID-19 Genomics UK (COG-UK) consortium

June 2021 V.3

**Funding acquisition, Leadership and supervision, Metadata curation, Project administration, Samples and logistics, Sequencing and analysis, Software and analysis tools, and Visualisation:**

Samuel C Robson <sup>13, 84</sup>

**Funding acquisition, Leadership and supervision, Metadata curation, Project administration, Samples and logistics, Sequencing and analysis, and Software and analysis tools:**

Thomas R Connor <sup>11, 74</sup> and Nicholas J Loman <sup>43</sup>

**Leadership and supervision, Metadata curation, Project administration, Samples and logistics, Sequencing and analysis, Software and analysis tools, and Visualisation:**

Tanya Golubchik <sup>5</sup>

**Funding acquisition, Leadership and supervision, Metadata curation, Samples and logistics, Sequencing and analysis, and Visualisation:**

Rocio T Martinez Nunez <sup>46</sup>

**Funding acquisition, Leadership and supervision, Project administration, Samples and logistics, Sequencing and analysis, and Software and analysis tools:**

David Bonsall <sup>5</sup>

**Funding acquisition, Leadership and supervision, Project administration, Sequencing and analysis, Software and analysis tools, and Visualisation:**

Andrew Rambaut <sup>104</sup>

**Funding acquisition, Metadata curation, Project administration, Samples and logistics, Sequencing and analysis, and Software and analysis tools:**

Luke B Snell <sup>12</sup>

**Leadership and supervision, Metadata curation, Project administration, Samples and logistics, Software and analysis tools, and Visualisation:**

Rich Livett <sup>116</sup>

**Funding acquisition, Leadership and supervision, Metadata curation, Project administration, and Samples and logistics:**

Catherine Ludden <sup>20, 70</sup>

**Funding acquisition, Leadership and supervision, Metadata curation, Samples and logistics, and Sequencing and analysis:**

Sally Corden <sup>74</sup> and Eleni Nastouli <sup>96, 95, 30</sup>

**Funding acquisition, Leadership and supervision, Metadata curation, Sequencing and analysis, and Software and analysis tools:**

Gaia Nebbia <sup>12</sup>

**Funding acquisition, Leadership and supervision, Project administration, Samples and logistics, and Sequencing and analysis:**

Ian Johnston <sup>116</sup>

**Leadership and supervision, Metadata curation, Project administration, Samples and logistics, and Sequencing and analysis:**

Katrina Lythgoe <sup>5</sup>, M. Estee Torok <sup>19,20</sup> and Ian G Goodfellow <sup>24</sup>

**Leadership and supervision, Metadata curation, Project administration, Samples and logistics, and Visualisation:**

Jacqui A Prieto <sup>97,82</sup> and Kordo Saeed <sup>97,83</sup>

**Leadership and supervision, Metadata curation, Project administration, Sequencing and analysis, and Software and analysis tools:**

David K Jackson <sup>116</sup>

**Leadership and supervision, Metadata curation, Samples and logistics, Sequencing and analysis, and Visualisation:**

Catherine Houlihan <sup>96,94</sup>

**Leadership and supervision, Metadata curation, Sequencing and analysis, Software and analysis tools, and Visualisation:**

Dan Frampton <sup>94,95</sup>

**Metadata curation, Project administration, Samples and logistics, Sequencing and analysis, and Software and analysis tools:**

William L Hamilton <sup>19</sup> and Adam A Witney <sup>41</sup>

**Funding acquisition, Samples and logistics, Sequencing and analysis, and Visualisation:**

Giselda Bucca <sup>101</sup>

**Funding acquisition, Leadership and supervision, Metadata curation, and Project administration:**

Cassie F Pope <sup>40,41</sup>

**Funding acquisition, Leadership and supervision, Metadata curation, and Samples and logistics:**

Catherine Moore <sup>74</sup>

**Funding acquisition, Leadership and supervision, Metadata curation, and Sequencing and analysis:**

Emma C Thomson <sup>53</sup>

**Funding acquisition, Leadership and supervision, Project administration, and Samples and logistics:**

Teresa Cutino-Moguel <sup>2</sup>, Ewan M Harrison <sup>116,102</sup>

**Funding acquisition, Leadership and supervision, Sequencing and analysis, and Visualisation:**

Colin P Smith <sup>101</sup>

**Leadership and supervision, Metadata curation, Project administration, and Sequencing and analysis:**

Fiona Rogan <sup>77</sup>

**Leadership and supervision, Metadata curation, Project administration, and Samples and logistics:**

Shaun M Beckwith <sup>6</sup>, Abigail Murray <sup>6</sup>, Dawn Singleton <sup>6</sup>, Kirstine Eastick <sup>37</sup>, Liz A Sheridan <sup>98</sup>, Paul Randell <sup>99</sup>, Leigh M Jackson <sup>105</sup>, Cristina V Ariani <sup>116</sup> and Sónia Gonçalves <sup>116</sup>

**Leadership and supervision, Metadata curation, Samples and logistics, and Sequencing and analysis:**

Derek J Fairley <sup>3,77</sup>, Matthew W Loose <sup>18</sup> and Joanne Watkins <sup>74</sup>

**Leadership and supervision, Metadata curation, Samples and logistics, and Visualisation:**

Samuel Moses <sup>25,106</sup>

**Leadership and supervision, Metadata curation, Sequencing and analysis, and Software and analysis tools:**

Sam Nicholls <sup>43</sup>, Matthew Bull <sup>74</sup> and Roberto Amato <sup>116</sup>

**Leadership and supervision, Project administration, Samples and logistics, and Sequencing and analysis:**

Darren L Smith <sup>36,65,66</sup>

**Leadership and supervision, Sequencing and analysis, Software and analysis tools, and Visualisation:**

David M Aanensen <sup>14,116</sup> and Jeffrey C Barrett <sup>116</sup>

**Metadata curation, Project administration, Samples and logistics, and Sequencing and analysis:**

Beatrix Kele <sup>2</sup>, Dinesh Aggarwal <sup>20,116,70</sup>, James G Shepherd <sup>53</sup>, Martin D Curran <sup>71</sup> and Surendra Parmar <sup>71</sup>

**Metadata curation, Project administration, Sequencing and analysis, and Software and analysis tools:**

Matthew D Parker <sup>109</sup>

**Metadata curation, Samples and logistics, Sequencing and analysis, and Software and analysis tools:**

Catryn Williams <sup>74</sup>

**Metadata curation, Samples and logistics, Sequencing and analysis, and Visualisation:**

Sharon Glaysher <sup>68</sup>

**Metadata curation, Sequencing and analysis, Software and analysis tools, and Visualisation:**

Anthony P Underwood <sup>14,116</sup>, Matthew Bashton <sup>36,65</sup>, Nicole Pacchiarini <sup>74</sup>, Katie F Loveson <sup>84</sup> and Matthew Byott <sup>95,96</sup>

**Project administration, Sequencing and analysis, Software and analysis tools, and Visualisation:**

Alessandro M Carabelli <sup>20</sup>

**Funding acquisition, Leadership and supervision, and Metadata curation:**

Kate E Templeton <sup>56,104</sup>

**Funding acquisition, Leadership and supervision, and Project administration:**

Thushan I de Silva <sup>109</sup>, Dennis Wang <sup>109</sup>, Cordelia F Langford <sup>116</sup> and John Sillitoe <sup>116</sup>

**Funding acquisition, Leadership and supervision, and Samples and logistics:**

Rory N Gunson <sup>55</sup>

**Funding acquisition, Leadership and supervision, and Sequencing and analysis:**

Simon Cottrell<sup>74</sup>, Justin O'Grady<sup>75, 103</sup> and Dominic Kwiatkowski<sup>116, 108</sup>

**Leadership and supervision, Metadata curation, and Project administration:**

Patrick J Lillie<sup>37</sup>

**Leadership and supervision, Metadata curation, and Samples and logistics:**

Nicholas Cortes<sup>33</sup>, Nathan Moore<sup>33</sup>, Claire Thomas<sup>33</sup>, Phillipa J Burns<sup>37</sup>, Tabitha W Mahungu<sup>80</sup> and Steven Liggett<sup>86</sup>

**Leadership and supervision, Metadata curation, and Sequencing and analysis:**

Angela H Beckett<sup>13, 81</sup> and Matthew TG Holden<sup>73</sup>

**Leadership and supervision, Project administration, and Samples and logistics:**

Lisa J Levett<sup>34</sup>, Husam Osman<sup>70, 35</sup> and Mohammed O Hassan-Ibrahim<sup>99</sup>

**Leadership and supervision, Project administration, and Sequencing and analysis:**

David A Simpson<sup>77</sup>

**Leadership and supervision, Samples and logistics, and Sequencing and analysis:**

Meera Chand<sup>72</sup>, Ravi K Gupta<sup>102</sup>, Alistair C Darby<sup>107</sup> and Steve Paterson<sup>107</sup>

**Leadership and supervision, Sequencing and analysis, and Software and analysis tools:**

Oliver G Pybus<sup>23</sup>, Erik M Volz<sup>39</sup>, Daniela de Angelis<sup>52</sup>, David L Robertson<sup>53</sup>, Andrew J Page<sup>75</sup> and Inigo Martincorena<sup>116</sup>

**Leadership and supervision, Sequencing and analysis, and Visualisation:**

Louise Aigrain<sup>116</sup> and Andrew R Bassett<sup>116</sup>

**Metadata curation, Project administration, and Samples and logistics:**

Nick Wong<sup>50</sup>, Yusri Taha<sup>89</sup>, Michelle J Erkiert<sup>99</sup> and Michael H Spencer Chapman<sup>116, 102</sup>

**Metadata curation, Project administration, and Sequencing and analysis:**

Rebecca Dewar<sup>56</sup> and Martin P McHugh<sup>56, 111</sup>

**Metadata curation, Project administration, and Software and analysis tools:**

Siddharth Mookerjee<sup>38, 57</sup>

**Metadata curation, Project administration, and Visualisation:**

Stephen Aplin<sup>97</sup>, Matthew Harvey<sup>97</sup>, Thea Sass<sup>97</sup>, Helen Umpleby<sup>97</sup> and Helen Wheeler<sup>97</sup>

**Metadata curation, Samples and logistics, and Sequencing and analysis:**

James P McKenna<sup>3</sup>, Ben Warne<sup>9</sup>, Joshua F Taylor<sup>22</sup>, Yasmin Chaudhry<sup>24</sup>, Rhys Izuagbe<sup>24</sup>, Aminu S Jahun<sup>24</sup>, Gregory R Young<sup>36, 65</sup>, Claire McMurray<sup>43</sup>, Clare M McCann<sup>65, 66</sup>, Andrew Nelson<sup>65, 66</sup> and Scott Elliott<sup>68</sup>

**Metadata curation, Samples and logistics, and Visualisation:**

Hannah Lowe<sup>25</sup>

**Metadata curation, Sequencing and analysis, and Software and analysis tools:**

Anna Price<sup>11</sup>, Matthew R Crown<sup>65</sup>, Sara Rey<sup>74</sup>, Sunando Roy<sup>96</sup> and Ben Temperton<sup>105</sup>

**Metadata curation, Sequencing and analysis, and Visualisation:**

Sharif Shaaban<sup>73</sup> and Andrew R Hesketh<sup>101</sup>

**Project administration, Samples and logistics, and Sequencing and analysis:**

Kenneth G Laing<sup>41</sup>, Irene M Monahan<sup>41</sup> and Judith Heaney<sup>95, 96, 34</sup>

**Project administration, Samples and logistics, and Visualisation:**

Emanuela Pelosi<sup>97</sup>, Siona Silveira<sup>97</sup> and Eleri Wilson-Davies<sup>97</sup>

**Samples and logistics, Software and analysis tools, and Visualisation:**

Helen Fryer<sup>5</sup>

**Sequencing and analysis, Software and analysis tools, and Visualization:**

Helen Adams<sup>4</sup>, Louis du Plessis<sup>23</sup>, Rob Johnson<sup>39</sup>, William T Harvey<sup>53, 42</sup>, Joseph Hughes<sup>53</sup>, Richard J Orton<sup>53</sup>, Lewis G Spurgin<sup>59</sup>, Yann Bourgeois<sup>81</sup>, Chris Ruis<sup>102</sup>, Áine O'Toole<sup>104</sup>, Marina Gourtovaia<sup>116</sup> and Theo Sanderson<sup>116</sup>

**Funding acquisition, and Leadership and supervision:**

Christophe Fraser<sup>5</sup>, Jonathan Edgeworth<sup>12</sup>, Judith Breuer<sup>96, 29</sup>, Stephen L Michell<sup>105</sup> and John A Todd<sup>115</sup>

**Funding acquisition, and Project administration:**

Michaela John<sup>10</sup> and David Buck<sup>115</sup>

**Leadership and supervision, and Metadata curation:**

Kavitha Gajee<sup>37</sup> and Gemma L Kay<sup>75</sup>

**Leadership and supervision, and Project administration:**

Sharon J Peacock<sup>20, 70</sup> and David Heyburn<sup>74</sup>

**Leadership and supervision, and Samples and logistics:**

Themoula Charalampous<sup>12, 46</sup>, Adela Alcolea-Medina<sup>32, 112</sup>, Katie Kitchman<sup>37</sup>, Alan McNally<sup>43, 93</sup>, David T Pritchard<sup>50</sup>, Samir Dervisevic<sup>58</sup>, Peter Muir<sup>70</sup>, Esther Robinson<sup>70, 35</sup>, Barry B Vipond<sup>70</sup>, Newara A Ramadan<sup>78</sup>, Christopher Jeanes<sup>90</sup>, Danni Weldon<sup>116</sup>, Jana Catalan<sup>118</sup> and Neil Jones<sup>118</sup>

**Leadership and supervision, and Sequencing and analysis:**

Ana da Silva Filipe<sup>53</sup>, Chris Williams<sup>74</sup>, Marc Fuchs<sup>77</sup>, Julia Miskelly<sup>77</sup>, Aaron R Jeffries<sup>105</sup>, Karen Oliver<sup>116</sup> and Naomi R Park<sup>116</sup>

**Metadata curation, and Samples and logistics:**

Amy Ash<sup>1</sup>, Cherian Koshy<sup>1</sup>, Magdalena Barrow<sup>7</sup>, Sarah L Buchan<sup>7</sup>, Anna Mantzouratou<sup>7</sup>, Gemma Clark<sup>15</sup>, Christopher W Holmes<sup>16</sup>, Sharon Campbell<sup>17</sup>, Thomas Davis<sup>21</sup>, Ngee Keong Tan<sup>22</sup>, Julianne R Brown<sup>29</sup>, Kathryn A Harris<sup>29, 2</sup>, Stephen P Kidd<sup>33</sup>, Paul R Grant<sup>34</sup>, Li Xu-McCrae<sup>35</sup>, Alison Cox<sup>38, 63</sup>, Pinglawathee Madona<sup>38, 63</sup>, Marcus Pond<sup>38, 63</sup>, Paul A Randell<sup>38, 63</sup>, Karen T Withell<sup>48</sup>, Cheryl Williams<sup>51</sup>, Clive Graham<sup>60</sup>, Rebecca Denton-Smith<sup>62</sup>, Emma Swindells<sup>62</sup>, Robyn Turnbull<sup>62</sup>, Tim J Sloan<sup>67</sup>, Andrew Bosworth<sup>70, 35</sup>, Stephanie Hutchings<sup>70</sup>, Hannah M Pymont<sup>70</sup>, Anna Casey<sup>76</sup>, Liz Ratcliffe<sup>76</sup>, Christopher R Jones<sup>79, 105</sup>, Bridget A Knight<sup>79, 105</sup>, Tanzina Haque<sup>80</sup>, Jennifer Hart<sup>80</sup>, Dianne Irish-Tavares<sup>80</sup>, Eric Witele<sup>80</sup>, Craig Mower<sup>86</sup>, Louisa K Watson<sup>86</sup>, Jennifer Collins<sup>89</sup>, Gary Eltringham<sup>89</sup>, Dorian Crudgington<sup>98</sup>, Ben Macklin<sup>98</sup>, Miren Iturriza-Gomara<sup>107</sup>, Anita O Lucaci<sup>107</sup> and Patrick C McClure<sup>113</sup>

**Metadata curation, and Sequencing and analysis:**

Matthew Carlile<sup>18</sup>, Nadine Holmes<sup>18</sup>, Christopher Moore<sup>18</sup>, Nathaniel Storey<sup>29</sup>, Stefan Rooke<sup>73</sup>, Gonzalo Yebra<sup>73</sup>, Noel Craine<sup>74</sup>, Malorie Perry<sup>74</sup>, Nabil-Fareed Alikhan<sup>75</sup>, Stephen Bridgett<sup>77</sup>, Kate F Cook<sup>84</sup>, Christopher Fearn<sup>84</sup>, Salman Goudarzi<sup>84</sup>, Ronan A Lyons<sup>88</sup>, Thomas Williams<sup>104</sup>, Sam T Haldenby<sup>107</sup>, Jillian Durham<sup>116</sup> and Steven Leonard<sup>116</sup>

**Metadata curation, and Software and analysis tools:**

Robert M Davies<sup>116</sup>

**Project administration, and Samples and logistics:**

Rahul Batra<sup>12</sup>, Beth Blane<sup>20</sup>, Moira J Spyer<sup>30,95,96</sup>, Perminder Smith<sup>32,112</sup>, Mehmet Yavus<sup>85,109</sup>, Rachel J Williams<sup>96</sup>, Adhyana IK Mahanama<sup>97</sup>, Buddhini Samaraweera<sup>97</sup>, Sophia T Girgis<sup>102</sup>, Samantha E Hansford<sup>109</sup>, Angie Green<sup>115</sup>, Charlotte Beaver<sup>116</sup>, Katherine L Bellis<sup>116,102</sup>, Matthew J Dorman<sup>116</sup>, Sally Kay<sup>116</sup>, Liam Prestwood<sup>116</sup> and Shavanthi Rajatileka<sup>116</sup>

**Project administration, and Sequencing and analysis:**

Joshua Quick<sup>43</sup>

**Project administration, and Software and analysis tools:**

Radoslaw Poplawski<sup>43</sup>

**Samples and logistics, and Sequencing and analysis:**

Nicola Reynolds<sup>8</sup>, Andrew Mack<sup>11</sup>, Arthur Morriss<sup>11</sup>, Thomas Whalley<sup>11</sup>, Bindi Patel<sup>12</sup>, Iliana Georgana<sup>24</sup>, Myra Hosmillo<sup>24</sup>, Malte L Pinckert<sup>24</sup>, Joanne Stockton<sup>43</sup>, John H Henderson<sup>65</sup>, Amy Hollis<sup>65</sup>, William Stanley<sup>65</sup>, Wen C Yew<sup>65</sup>, Richard Myers<sup>72</sup>, Alicia Thornton<sup>72</sup>, Alexander Adams<sup>74</sup>, Tara Annett<sup>74</sup>, Hibo Asad<sup>74</sup>, Alec Birchley<sup>74</sup>, Jason Coombes<sup>74</sup>, Johnathan M Evans<sup>74</sup>, Laia Fina<sup>74</sup>, Bree Gatica-Wilcox<sup>74</sup>, Lauren Gilbert<sup>74</sup>, Lee Graham<sup>74</sup>, Jessica Hey<sup>74</sup>, Ember Hilvers<sup>74</sup>, Sophie Jones<sup>74</sup>, Hannah Jones<sup>74</sup>, Sara Kumziene-Summerhayes<sup>74</sup>, Caoimhe McKerr<sup>74</sup>, Jessica Powell<sup>74</sup>, Georgia Pugh<sup>74</sup>, Sarah Taylor<sup>74</sup>, Alexander J Trotter<sup>75</sup>, Charlotte A Williams<sup>96</sup>, Leanne M Kermack<sup>102</sup>, Benjamin H Foulkes<sup>109</sup>, Marta Gallis<sup>109</sup>, Hailey R Hornsby<sup>109</sup>, Stavroula F Louka<sup>109</sup>, Manoj Pohare<sup>109</sup>, Paige Wolverson<sup>109</sup>, Peijun Zhang<sup>109</sup>, George MacIntyre-Cockett<sup>115</sup>, Amy Trebes<sup>115</sup>, Robin J Moll<sup>116</sup>, Lynne Ferguson<sup>117</sup>, Emily J Goldstein<sup>117</sup>, Alasdair Maclean<sup>117</sup> and Rachael Tomb<sup>117</sup>

**Samples and logistics, and Software and analysis tools:**

Igor Starinskij<sup>53</sup>

**Sequencing and analysis, and Software and analysis tools:**

Laura Thomson<sup>5</sup>, Joel Southgate<sup>11,74</sup>, Moritz UG Kraemer<sup>23</sup>, Jayna Raghwanani<sup>23</sup>, Alex E Zarebski<sup>23</sup>, Olivia Boyd<sup>39</sup>, Lily Geidelberg<sup>39</sup>, Chris J Illingworth<sup>52</sup>, Chris Jackson<sup>52</sup>, David Pascall<sup>52</sup>, Sreenu Vattipally<sup>53</sup>, Timothy M Freeman<sup>109</sup>, Sharon N Hsu<sup>109</sup>, Benjamin B Lindsey<sup>109</sup>, Keith James<sup>116</sup>, Kevin Lewis<sup>116</sup>, Gerry Tonkin-Hill<sup>116</sup> and Jaime M Tovar-Corona<sup>116</sup>

**Sequencing and analysis, and Visualisation:**

MacGregor Cox<sup>20</sup>

**Software and analysis tools, and Visualisation:**

Khalil Abudahab<sup>14,116</sup>, Mirko Menegazzo<sup>14</sup>, Ben EW Taylor MEng<sup>14,116</sup>, Corin A Yeats<sup>14</sup>, Afrida Mukaddas<sup>53</sup>, Derek W Wright<sup>53</sup>, Leonardo de Oliveira Martins<sup>75</sup>, Rachel Colquhoun<sup>104</sup>, Verity Hill<sup>104</sup>, Ben Jackson<sup>104</sup>, JT McCrone<sup>104</sup>, Nathan Medd<sup>104</sup>, Emily Scher<sup>104</sup> and Jon-Paul Keatley<sup>116</sup>

**Leadership and supervision:**

Tanya Curran<sup>3</sup>, Sian Morgan<sup>10</sup>, Patrick Maxwell<sup>20</sup>, Ken Smith<sup>20</sup>, Sahar Eldirdiri<sup>21</sup>, Anita Kenyon<sup>21</sup>, Alison H Holmes<sup>38,57</sup>, James R Price<sup>38,57</sup>, Tim Wyatt<sup>69</sup>, Alison E Mather<sup>75</sup>, Timofey Skvortsov<sup>77</sup> and John A Hartley<sup>96</sup>

**Metadata curation:**

Martyn Guest<sup>11</sup>, Christine Kitchen<sup>11</sup>, Ian Merrick<sup>11</sup>, Robert Munn<sup>11</sup>, Beatrice Bertolusso<sup>33</sup>, Jessica Lynch<sup>33</sup>, Gabrielle Vernet<sup>33</sup>, Stuart Kirk<sup>34</sup>, Elizabeth Wastnedge<sup>56</sup>, Rachael Stanley<sup>58</sup>, Giles Idle<sup>64</sup>, Declan T Bradley<sup>69,77</sup>, Nicholas F Killough<sup>69</sup>, Jennifer Poyner<sup>79</sup> and Matilde Mori<sup>110</sup>

**Project administration:**

Owen Jones<sup>11</sup>, Victoria Wright<sup>18</sup>, Ellena Brooks<sup>20</sup>, Carol M Churcher<sup>20</sup>, Mireille Fragakis<sup>20</sup>, Katerina Galai<sup>20,70</sup>, Andrew Jermy<sup>20</sup>, Sarah Judges<sup>20</sup>, Georgina M McManus<sup>20</sup>, Kim S Smith<sup>20</sup>, Elaine Westwick<sup>20</sup>, Stephen W Attwood<sup>23</sup>, Frances Bolt<sup>38,57</sup>, Alisha Davies<sup>74</sup>, Elen De Lacy<sup>74</sup>, Fatima Downing<sup>74</sup>, Sue Edwards<sup>74</sup>, Lizzie Meadows<sup>75</sup>, Sarah Jeremiah<sup>97</sup>, Nikki Smith<sup>109</sup> and Luke Foulser<sup>116</sup>

**Samples and logistics:**

Amita Patel<sup>12</sup>, Louise Berry<sup>15</sup>, Tim Boswell<sup>15</sup>, Vicki M Fleming<sup>15</sup>, Hannah C Howson-Wells<sup>15</sup>, Amelia Joseph<sup>15</sup>, Manjinder Khakh<sup>15</sup>, Michelle M Lister<sup>15</sup>, Paul W Bird<sup>16</sup>, Karlie Fallon<sup>16</sup>, Thomas Helmer<sup>16</sup>, Claire L McMurray<sup>16</sup>, Mina Odedra<sup>16</sup>, Jessica Shaw<sup>16</sup>, Julian W Tang<sup>16</sup>, Nicholas J Willford<sup>16</sup>, Victoria Blakey<sup>17</sup>, Veena Raviprakash<sup>17</sup>, Nicola Sheriff<sup>17</sup>, Lesley-Anne Williams<sup>17</sup>, Theresa Feltwell<sup>20</sup>, Luke Bedford<sup>26</sup>, James S Cargill<sup>27</sup>, Warwick Hughes<sup>27</sup>, Jonathan Moore<sup>28</sup>, Susanne Stonehouse<sup>28</sup>, Laura Atkinson<sup>29</sup>, Jack CD Lee<sup>29</sup>, Dr Divya Shah<sup>29</sup>, Natasha Ohemeng-Kumi<sup>32,112</sup>, John Ramble<sup>32,112</sup>, Jasveen Sehmi<sup>32,112</sup>, Rebecca Williams<sup>33</sup>, Wendy Chatterton<sup>34</sup>, Monika Pusok<sup>34</sup>, William Everson<sup>37</sup>, Anibolina Castigador<sup>44</sup>, Emily Macnaughton<sup>44</sup>, Kate El Bouzidi<sup>45</sup>, Temi Lampejo<sup>45</sup>, Malur Sudhanva<sup>45</sup>, Cassie Breen<sup>47</sup>, Graciela Sluga<sup>48</sup>, Shazaad SY Ahmad<sup>49,70</sup>, Ryan P George<sup>49</sup>, Nicholas W Machin<sup>49,70</sup>, Debbie Binns<sup>50</sup>, Victoria James<sup>50</sup>, Rachel Blacow<sup>55</sup>, Lindsay Coupland<sup>58</sup>, Louise Smith<sup>59</sup>, Edward Barton<sup>60</sup>, Debra Padgett<sup>60</sup>, Garren Scott<sup>60</sup>, Aidan Cross<sup>61</sup>, Mariyam Mirfenderesky<sup>61</sup>, Jane Greenaway<sup>62</sup>, Kevin Cole<sup>64</sup>, Phillip Clarke<sup>67</sup>, Nichola Duckworth<sup>67</sup>, Sarah Walsh<sup>67</sup>, Kelly Bicknell<sup>68</sup>, Robert Impey<sup>68</sup>, Sarah Wyllie<sup>68</sup>, Richard Hopes<sup>70</sup>, Chloe Bishop<sup>72</sup>, Vicki Chalker<sup>72</sup>, Ian Harrison<sup>72</sup>, Laura Gifford<sup>74</sup>, Zoltan Molnar<sup>77</sup>, Cressida Auckland<sup>79</sup>, Cariad Evans<sup>85,109</sup>, Kate Johnson<sup>85,109</sup>, David G Partridge<sup>85,109</sup>, Mohammad Raza<sup>85,109</sup>, Paul Baker<sup>86</sup>, Stephen Bonner<sup>86</sup>, Sarah Essex<sup>86</sup>, Leanne J Murray<sup>86</sup>, Andrew I Lawton<sup>87</sup>, Shirelle Burton-Fanning<sup>89</sup>, Brendan AI Payne<sup>89</sup>, Sheila Waugh<sup>89</sup>, Andrea N Gomes<sup>91</sup>, Maimuna Kimuli<sup>91</sup>, Darren R Murray<sup>91</sup>, Paula Ashfield<sup>92</sup>, Donald Dobie<sup>92</sup>, Fiona Ashford<sup>93</sup>, Angus Best<sup>93</sup>, Liam Crawford<sup>93</sup>, Nicola Cumley<sup>93</sup>, Megan Mayhew<sup>93</sup>, Oliver Megram<sup>93</sup>, Jeremy Mirza<sup>93</sup>, Emma Moles-Garcia<sup>93</sup>, Benita Percival<sup>93</sup>, Megan Driscoll<sup>96</sup>, Leah Ensell<sup>96</sup>, Helen L Lowe<sup>96</sup>, Laurentiu Maftai<sup>96</sup>, Matteo Mondani<sup>96</sup>, Nicola J Chaloner<sup>99</sup>, Benjamin J Cogger<sup>99</sup>, Lisa J Easton<sup>99</sup>, Hannah Huckson<sup>99</sup>, Jonathan Lewis<sup>99</sup>, Sarah Lowdon<sup>99</sup>, Cassandra S Malone<sup>99</sup>, Florence Munemo<sup>99</sup>, Manasa Mutingwende<sup>99</sup>, Roberto Nicodemi<sup>99</sup>, Olga Podplomyk<sup>99</sup>, Thomas Somassa<sup>99</sup>, Andrew Beggs<sup>100</sup>, Alex Richter<sup>100</sup>, Claire Cormie<sup>102</sup>, Joana Dias<sup>102</sup>, Sally Forrest<sup>102</sup>, Ellen E Higginson<sup>102</sup>, Mailis Maes<sup>102</sup>, Jamie Young<sup>102</sup>, Rose K Davidson<sup>103</sup>, Kathryn A Jackson<sup>107</sup>, Alexander J Keeley<sup>109</sup>, Jonathan Ball<sup>113</sup>, Timothy Byaruhanga<sup>113</sup>, Joseph G Chappell<sup>113</sup>, Jayasree Dey<sup>113</sup>, Jack D Hill<sup>113</sup>, Emily J Park<sup>113</sup>, Arezou Fanaie<sup>114</sup>, Rachel A Hilson<sup>114</sup>, Geraldine Yaze<sup>114</sup> and Stephanie Lo<sup>116</sup>

**Sequencing and analysis:**

Safiah Afifi<sup>10</sup>, Robert Beer<sup>10</sup>, Joshua Maksimovic<sup>10</sup>, Kathryn McCluggage<sup>10</sup>, Karla Spellman<sup>10</sup>, Catherine Bresner<sup>11</sup>, William Fuller<sup>11</sup>, Angela Marchbank<sup>11</sup>, Trudy Workman<sup>11</sup>, Ekaterina Shelest<sup>13,81</sup>, Johnny Debebe<sup>18</sup>, Fei Sang<sup>18</sup>, Sarah Francois<sup>23</sup>, Bernardo Gutierrez<sup>23</sup>, Tetyana I Vasylyeva<sup>23</sup>, Flavia Flaviani<sup>31</sup>, Manon Ragonnet-Cronin<sup>39</sup>, Katherine L Smollett<sup>42</sup>, Alice Broos<sup>53</sup>, Daniel Mair<sup>53</sup>, Jenna Nichols<sup>53</sup>, Kyriaki Nomikou<sup>53</sup>, Lily Tong<sup>53</sup>, Ioulia Tsatsani<sup>53</sup>, Sarah O'Brien<sup>54</sup>, Steven Rushton<sup>54</sup>, Roy Sanderson<sup>54</sup>, Jon Perkins<sup>55</sup>, Seb Cotton<sup>56</sup>, Abbie Gallagher<sup>56</sup>, Elias Allara<sup>70,102</sup>, Clare Pearson



<sup>70, 102</sup>, David Bibby <sup>72</sup>, Gavin Dabrera <sup>72</sup>, Nicholas Ellaby <sup>72</sup>, Eileen Gallagher <sup>72</sup>, Jonathan Hubb <sup>72</sup>, Angie Lackenby <sup>72</sup>, David Lee <sup>72</sup>, Nikos Manesis <sup>72</sup>, Tamyo Mbisa <sup>72</sup>, Steven Platt <sup>72</sup>, Katherine A Twohig <sup>72</sup>, Mari Morgan <sup>74</sup>, Alp Aydin <sup>75</sup>, David J Baker <sup>75</sup>, Ebenezer Foster-Nyarko <sup>75</sup>, Sophie J Prosolek <sup>75</sup>, Steven Rudder <sup>75</sup>, Chris Baxter <sup>77</sup>, Silvia F Carvalho <sup>77</sup>, Deborah Lavin <sup>77</sup>, Arun Mariappan <sup>77</sup>, Clara Radulescu <sup>77</sup>, Aditi Singh <sup>77</sup>, Miao Tang <sup>77</sup>, Helen Morcrette <sup>79</sup>, Nadua Bayzid <sup>96</sup>, Marius Cotic <sup>96</sup>, Carlos E Balcazar <sup>104</sup>, Michael D Gallagher <sup>104</sup>, Daniel Maloney <sup>104</sup>, Thomas D Stanton <sup>104</sup>, Kathleen A Williamson <sup>104</sup>, Robin Manley <sup>105</sup>, Michelle L Michelsen <sup>105</sup>, Christine M Sambles <sup>105</sup>, David J Studholme <sup>105</sup>, Joanna Warwick-Dugdale <sup>105</sup>, Richard Eccles <sup>107</sup>, Matthew Gemmell <sup>107</sup>, Richard Gregory <sup>107</sup>, Margaret Hughes <sup>107</sup>, Charlotte Nelson <sup>107</sup>, Lucille Rainbow <sup>107</sup>, Edith E Vamos <sup>107</sup>, Hermione J Webster <sup>107</sup>, Mark Whitehead <sup>107</sup>, Claudia Wierzbicki <sup>107</sup>, Adrienn Angyal <sup>109</sup>, Luke R Green <sup>109</sup>, Max Whiteley <sup>109</sup>, Emma Betteridge <sup>116</sup>, Iraad F Bronner <sup>116</sup>, Ben W Farr <sup>116</sup>, Scott Goodwin <sup>116</sup>, Stefanie V Lensing <sup>116</sup>, Shane A McCarthy <sup>116, 102</sup>, Michael A Quail <sup>116</sup>, Diana Rajan <sup>116</sup>, Nicholas M Redshaw <sup>116</sup>, Carol Scott <sup>116</sup>, Lesley Shirley <sup>116</sup> and Scott AJ Thurston <sup>116</sup>

#### **Software and analysis tools:**

Will Rowe <sup>43</sup>, Amy Gaskin <sup>74</sup>, Thanh Le-Viet <sup>75</sup>, James Bonfield <sup>116</sup>, Jennifer Liddle <sup>116</sup> and Andrew Whitwham <sup>116</sup>

**1** Barking, Havering and Redbridge University Hospitals NHS Trust, **2** Barts Health NHS Trust, **3** Belfast Health & Social Care Trust, **4** Betsi Cadwaladr University Health Board, **5** Big Data Institute, Nuffield Department of Medicine, University of Oxford, **6** Blackpool Teaching Hospitals NHS Foundation Trust, **7** Bournemouth University, **8** Cambridge Stem Cell Institute, University of Cambridge, **9** Cambridge University Hospitals NHS Foundation Trust, **10** Cardiff and Vale University Health Board, **11** Cardiff University, **12** Centre for Clinical Infection and Diagnostics Research, Department of Infectious Diseases, Guy's and St Thomas' NHS Foundation Trust, **13** Centre for Enzyme Innovation, University of Portsmouth, **14** Centre for Genomic Pathogen Surveillance, University of Oxford, **15** Clinical Microbiology Department, Queens Medical Centre, Nottingham University Hospitals NHS Trust, **16** Clinical Microbiology, University Hospitals of Leicester NHS Trust, **17** County Durham and Darlington NHS Foundation Trust, **18** Deep Seq, School of Life Sciences, Queens Medical Centre, University of Nottingham, **19** Department of Infectious Diseases and Microbiology, Cambridge University Hospitals NHS Foundation Trust, **20** Department of Medicine, University of Cambridge, **21** Department of Microbiology, Kettering General Hospital, **22** Department of Microbiology, South West London Pathology, **23** Department of Zoology, University of Oxford, **24** Division of Virology, Department of Pathology, University of Cambridge, **25** East Kent Hospitals University NHS Foundation Trust, **26** East Suffolk and North Essex NHS Foundation Trust, **27** East Sussex Healthcare NHS Trust, **28** Gateshead Health NHS Foundation Trust, **29** Great Ormond Street Hospital for Children NHS Foundation Trust, **30** Great Ormond Street Institute of Child Health (GOS ICH), University College London (UCL), **31** Guy's and St. Thomas' Biomedical Research Centre, **32** Guy's and St. Thomas' NHS Foundation Trust, **33** Hampshire Hospitals NHS Foundation Trust, **34** Health Services Laboratories, **35** Heartlands Hospital, Birmingham, **36** Hub for Biotechnology in the Built Environment, Northumbria University, **37** Hull University Teaching Hospitals NHS Trust, **38** Imperial College Healthcare NHS Trust, **39** Imperial College London, **40** Infection Care Group, St George's University Hospitals NHS Foundation Trust, **41** Institute for Infection and Immunity, St George's University of London, **42** Institute of Biodiversity, Animal Health & Comparative Medicine, **43** Institute of Microbiology and Infection, University of Birmingham, **44** Isle of Wight NHS Trust, **45** King's College Hospital NHS Foundation Trust, **46** King's College London, **47** Liverpool Clinical Laboratories, **48** Maidstone and Tunbridge Wells NHS Trust, **49** Manchester University NHS Foundation Trust, **50** Microbiology Department, Buckinghamshire Healthcare NHS Trust, **51** Microbiology, Royal Oldham Hospital, **52** MRC Biostatistics Unit, University of Cambridge, **53** MRC-University of Glasgow Centre for Virus Research, **54** Newcastle University, **55** NHS Greater Glasgow and Clyde, **56** NHS Lothian, **57** NIHR Health Protection Research Unit in HCAI and AMR, Imperial College London, **58** Norfolk and Norwich University Hospitals NHS Foundation Trust, **59** Norfolk County Council, **60** North Cumbria Integrated Care NHS Foundation Trust, **61** North Middlesex University Hospital NHS Trust, **62** North Tees and Hartlepool NHS Foundation Trust, **63** North West London Pathology, **64** Northumbria Healthcare NHS Foundation Trust, **65** Northumbria University, **66** NU-OMICS, Northumbria University, **67** Path Links, Northern Lincolnshire and Goole NHS Foundation Trust, **68** Portsmouth Hospitals University NHS Trust, **69** Public Health Agency, Northern Ireland, **70** Public Health England, **71** Public Health England, Cambridge, **72** Public Health England, Colindale, **73** Public Health Scotland, **74** Public Health Wales, **75** Quadram Institute Bioscience, **76** Queen

Elizabeth Hospital, Birmingham, **77** Queen's University Belfast, **78** Royal Brompton and Harefield Hospitals, **79** Royal Devon and Exeter NHS Foundation Trust, **80** Royal Free London NHS Foundation Trust, **81** School of Biological Sciences, University of Portsmouth, **82** School of Health Sciences, University of Southampton, **83** School of Medicine, University of Southampton, **84** School of Pharmacy & Biomedical Sciences, University of Portsmouth, **85** Sheffield Teaching Hospitals NHS Foundation Trust, **86** South Tees Hospitals NHS Foundation Trust, **87** Southwest Pathology Services, **88** Swansea University, **89** The Newcastle upon Tyne Hospitals NHS Foundation Trust, **90** The Queen Elizabeth Hospital King's Lynn NHS Foundation Trust, **91** The Royal Marsden NHS Foundation Trust, **92** The Royal Wolverhampton NHS Trust, **93** Turnkey Laboratory, University of Birmingham, **94** University College London Division of Infection and Immunity, **95** University College London Hospital Advanced Pathogen Diagnostics Unit, **96** University College London Hospitals NHS Foundation Trust, **97** University Hospital Southampton NHS Foundation Trust, **98** University Hospitals Dorset NHS Foundation Trust, **99** University Hospitals Sussex NHS Foundation Trust, **100** University of Birmingham, **101** University of Brighton, **102** University of Cambridge, **103** University of East Anglia, **104** University of Edinburgh, **105** University of Exeter, **106** University of Kent, **107** University of Liverpool, **108** University of Oxford, **109** University of Sheffield, **110** University of Southampton, **111** University of St Andrews, **112** Viapath, Guy's and St Thomas' NHS Foundation Trust, and King's College Hospital NHS Foundation Trust, **113** Virology, School of Life Sciences, Queens Medical Centre, University of Nottingham, **114** Watford General Hospital, **115** Wellcome Centre for Human Genetics, Nuffield Department of Medicine, University of Oxford, **116** Wellcome Sanger Institute, **117** West of Scotland Specialist Virology Centre, NHS Greater Glasgow and Clyde, **118** Whittington Health NHS Trust
